# Supplementary material
Source: HighWire-hosted journal article supplement (https://erj.ersjournals.com/content/58/5/2004168)

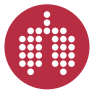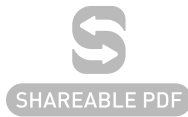

# Identification of a novel subset of alveolar type 2 cells enriched in PD-L1 and expanded following pneumonectomy

Negah Ahmadvand<sup>1,2</sup>, Farhad Khosravi<sup>3</sup>, Arun Lingampally<sup>1,2</sup>, Roxana Wasnick<sup>2</sup>, Ana Ivonne Vazquez-Armendariz<sup>4</sup>, Gianni Carraro<sup>4</sup>, Monika Heiner<sup>2</sup>, Stefano Rivetti<sup>1,2</sup>, Yuqing Lv<sup>1</sup>, Jochen Wilhelm<sup>5</sup>, Andreas Gunther<sup>6</sup>, Susanne Herold<sup>2</sup>, Denise Al Alam<sup>6</sup>, Chengshui Chen<sup>1</sup>, Parviz Minoo<sup>6,7</sup>, Jin-San Zhang<sup>1,8</sup> and Saverio Bellusci<sup>1,2,8</sup>

<sup>1</sup>Key Laboratory of Interventional Pulmonology of Zhejiang Province, Dept of Pulmonary and Critical Care Medicine, The First Affiliated Hospital of Wenzhou Medical University, Wenzhou, China. <sup>2</sup>Cardio-Pulmonary Institute, Institute of Lung Health and Dept of Pulmonary and Critical Care Medicine and Infectious Diseases, Universities of Giessen and Marburg Lung Center (UGMLC), member of the German Center for Lung Research (DZL), Justus-Liebig University Giessen, Giessen, Germany. <sup>3</sup>Dept of Physiology, Justus-Liebig University Giessen, Giessen, Germany. <sup>4</sup>Dept of Medicine, Cedars-Sinai Medical Center, Lung and Regenerative Medicine Institutes, Los Angeles, CA, USA. <sup>5</sup>Cardio-Pulmonary Institute (CPI), Universities of Giessen and Marburg Lung Center (UGMLC), Institute for Lung Health (ILH), Member of the German Center for Lung Research (DZL), Justus-Liebig University Giessen, Giessen, Germany. <sup>6</sup>Lundquist Institute for Biomedical Innovation at Harbor-UCLA Medical Center, Los Angeles, CA, USA. <sup>7</sup>Division of Newborn Medicine, Dept of Pediatrics, University of Southern California and Children's Hospital Los Angeles, Los Angeles, CA, USA. <sup>8</sup>J-S. Zhang and S. Bellusci contributed equally to this article as lead authors and supervised the work.

Corresponding author: Saverio Bellusci ([saverio.bellusci@innere.med.uni-giessen.de](mailto:saverio.bellusci@innere.med.uni-giessen.de))

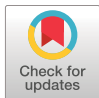

Shareable abstract (@ERSpublications)

**A novel population of AT2 progenitor cells enriched for PD-L1 has been identified. This normally quiescent subpopulation of AT2 cells becomes highly proliferative and differentiates into mature AT2 in response to alveolar injury.** <https://bit.ly/31G0IIW>

**Cite this article as:** Ahmadvand N, Khosravi F, Lingampally A, et al. Identification of a novel subset of alveolar type 2 cells enriched in PD-L1 and expanded following pneumonectomy. *Eur Respir J* 2021; 58: 2004168 [DOI: 10.1183/13993003.04168-2020].

This single-page version can be shared freely online.

## Abstract

Alveolar type 2 (AT2) cells are heterogeneous cells, with specialised AT2 subpopulations within this lineage exhibiting stem cell properties. However, the existence of quiescent, immature cells within the AT2 lineage that are activated during lung regeneration is unknown.

*Sftpc*<sup>CreERT2/+</sup>; *tdTomato*<sup>fllox/fllox</sup> mice were used for the labelling of AT2 cells and labelled subpopulations were analysed by flow cytometry, quantitative PCR, assay for transposase-accessible chromatin using sequencing (ATAC-seq), gene arrays, pneumonectomy and culture of precision-cut lung slices. Single-cell RNA-sequencing (scRNA-seq) data from human lungs were analysed.

In mice, we detected two distinct AT2 subpopulations, with low *tdTomato* level (Tom<sup>Low</sup>) and high *tdTomato* level (Tom<sup>High</sup>). Tom<sup>Low</sup> cells express lower levels of the AT2 differentiation markers *Fgfr2b* and *Etv5*, while Tom<sup>High</sup>, as *bona fide* mature AT2 cells, show higher levels of *Sftpc*, *Sftpb*, *Sftpa1*, *Fgfr2b* and *Etv5* expression. ATAC-seq analysis indicates that Tom<sup>Low</sup> and Tom<sup>High</sup> cells constitute two distinct cell populations, with specific silencing of *Sftpc*, *Rosa26* and cell cycle gene loci in the Tom<sup>Low</sup> population. Upon pneumonectomy, the number of Tom<sup>Low</sup> but not Tom<sup>High</sup> cells increases and Tom<sup>Low</sup> cells show upregulated expression of *Fgfr2b*, *Etv5*, *Sftpc*, *Ccnd1* and *Ccnd2* compared to Sham. Tom<sup>Low</sup> cells overexpress programmed cell death 1 ligand 1 (PD-L1), an immune inhibitory membrane receptor ligand, which is used by flow cytometry to differentially isolate these two subpopulations. In the human lung, data mining of a recent scRNA-seq AT2 data set demonstrates the existence of a *PD-L1*<sup>Pos</sup> population. Therefore, we have identified a novel population of AT2 quiescent, immature progenitor cells in mouse that expand upon pneumonectomy and we have provided evidence for the existence of such cells in human.

Copyright ©The authors 2021.

This version is distributed under the terms of the Creative Commons Attribution Non-Commercial Licence 4.0. For commercial reproduction rights and permissions contact [permissions@ersnet.org](mailto:permissions@ersnet.org)

This article has supplementary material available from [erj.ersjournals.com](http://erj.ersjournals.com)

This article has an editorial commentary: <https://doi.org/10.1183/13993003.01417-2021>

Received: 22 May 2020  
Accepted: 26 March 2021

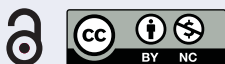

Supplement: inline-supplementary-material-13 [file inline-supplementary-material-13.pdf]
